# Supplementary material
Source: HighWire-hosted journal article supplement (https://bmjopen.bmj.com/content/9/2/e023849)
Supplement: inline-supplementary-material-1 [file inline-supplementary-material-1.pdf]

**Table S1. Fetal outcomes in pregnant women with SLE (N=338)**

| <b>Fetal outcomes</b>       | <b>N</b>   | <b>%</b>     |
|-----------------------------|------------|--------------|
| <b>Live birth</b>           | <b>300</b> | <b>88.8%</b> |
| <b>Term birth</b>           | 214        | 63.3%        |
| <b>Preterm birth</b>        | 86         | 25.4%        |
| <b>LBW</b>                  | 68         | 20.1%        |
| <b>Term LBW</b>             | 13         | 3.8%         |
| <b>Preterm LBW</b>          | 55         | 16.3%        |
| <b>Fetal loss</b>           | <b>38</b>  | <b>11.2%</b> |
| <b>Spontaneous abortion</b> | 11         | 3.3%         |
| <b>Therapeutic abortion</b> | 21         | 6.2%         |
| <b>Stillbirth</b>           | 6          | 1.8%         |
| <b>Neonatal death</b>       | 0          | 0.0%         |

NOTE: LBW=Low birth weight

**Table S2. Spearman correlations among potential predictors of SLE fetal loss**

| <b>Predictors</b>           | <b>Unplanned pregnancy</b> | <b>Pre-pregnancy HBP</b> | <b>Hypo-C<sub>3</sub></b> | <b>Hypo-C<sub>4</sub></b> | <b>Renal disorder</b> | <b>Hematologic disorder</b> | <b>Anti-dsDNA</b> | <b>24h-Urinary protein</b> |
|-----------------------------|----------------------------|--------------------------|---------------------------|---------------------------|-----------------------|-----------------------------|-------------------|----------------------------|
| <b>Unplanned pregnancy</b>  | 1.00                       | 0.09                     | 0.10                      | 0.14*                     | 0.16**                | 0.29**                      | 0.03              | 0.15**                     |
| <b>Pre-pregnancy HBP</b>    |                            | 1.00                     | 0.05                      | 0.06                      | 0.121*                | -0.09                       | 0.10              | 0.10                       |
| <b>Hypo-C<sub>3</sub></b>   |                            |                          | 1.00                      | 0.46**                    | 0.23**                | 0.23**                      | 0.15**            | 0.39**                     |
| <b>Hypo-C<sub>4</sub></b>   |                            |                          |                           | 1.00                      | 0.17**                | 0.14**                      | 0.11              | 0.29**                     |
| <b>Renal disorder</b>       |                            |                          |                           |                           | 1.00                  | 0.07                        | 0.03              | 0.63**                     |
| <b>Hematologic disorder</b> |                            |                          |                           |                           |                       | 1.00                        | 0.13*             | 0.15**                     |
| <b>Anti-dsDNA</b>           |                            |                          |                           |                           |                       |                             | 1.00              | 0.04s                      |
| <b>24h-Urinary protein</b>  |                            |                          |                           |                           |                       |                             |                   | 1.00                       |

NOTE: \*P<0.05; \*\*P<0.01; Pre-pregnancy HBP = Pre-pregnancy hypertension; Hypo-C<sub>3</sub>=Hypocomplementania-C<sub>3</sub>; Hypo-C<sub>4</sub>=Hypocomplementania-C<sub>4</sub>

**Table S3. ROC curve coordinates**

| Cut-off | Sensitivity | 1-Specificity |
|---------|-------------|---------------|
| -1      | 1           | 1             |
| 0.5     | 0.842       | 0.457         |
| 1.5     | 0.816       | 0.287         |
| 2.5     | 0.711       | 0.107         |
| 3.5     | 0.605       | 0.067         |
| 4.5     | 0.237       | 0.017         |
| 6       | 0           | 0             |

**Table S4. Using 1.5 as cutoff value**

| Risk           | N   | %     | Fetal loss(N) | Fetal loss(%) |
|----------------|-----|-------|---------------|---------------|
| Low risk (0-1) | 221 | 65.4% | 7             | 3.2%          |
| High risk (>1) | 117 | 34.6% | 31            | 26.5%         |
| Total          | 338 | 100%  | 38            | 11.2%         |

P<0.01

Sensitivity= 31/38=81.6%

Specificity=214/300=71.3%

Accuracy= (31+214)/338=72.5%

Positive predictive value=31/117=26.5%

Negative predictive value=214/221=96.8%

Positive likelihood ratio= Sensitivity/ (1- Specificity)=0.816/(1-0.713)=2.84

Negative likelihood ratio=(1-Sensitivity)/Specificity= (1-0.816)/0.713=0.26

**Table S5. Using 2.5 as cutoff value**

| Risk           | N   | %     | Fetal loss(N) | Fetal loss(%) |
|----------------|-----|-------|---------------|---------------|
| Low risk (0-2) | 279 | 82.5% | 11            | 3.9%          |
| High risk (>2) | 59  | 17.5% | 27            | 45.8%         |
| Total          | 338 | 100%  | 38            | 11.2%         |

P<0.01

Sensitivity= 27/38=71.1%

Specificity=268/300=89.3%

Accuracy= (27+268)/338=87.3%

Positive predictive value=27/59=45.8%

Negative predictive value=268/279=96.1%

Positive likelihood ratio= Sensitivity/ (1- Specificity)=0.711/(1-0.893)=6.64

Negative likelihood ratio=(1-Sensitivity)/Specificity= (1-0.711)/0.893=0.32

**Table S6. Using 3.5 as cutoff value**

| Risk           | N   | %     | Fetal loss(N) | Fetal loss(%) |
|----------------|-----|-------|---------------|---------------|
| Low risk (0-3) | 295 | 87.3% | 15            | 5.1%          |
| High risk (>3) | 43  | 12.7% | 23            | 53.5%         |
| Total          | 338 | 100%  | 38            | 11.2%         |

P<0.01

Sensitivity=  $23/38=60.5\%$

Specificity= $280/300=93.3\%$

Accuracy=  $(23+280)/338=89.6\%$

Positive predictive value= $23/43=53.5\%$

Negative predictive value= $280/295=94.9\%$

Positive likelihood ratio=  $\text{Sensitivity}/(1-\text{Specificity})=0.605/(1-0.933)=9.03$

Negative likelihood ratio= $(1-\text{Sensitivity})/\text{Specificity}=(1-0.605)/0.933=0.42$
